# Supplementary material for: Determination of relative rare earth element distributions in very small quantities of uranium ore concentrates using femtosecond UV laser ablation – SF-ICP-MS coupling
Source: Royal Society of Chemistry journal article supplement (doi:10.1039/c5ja00309a), 2015-01-01
Supplement: c5ja00309a1.pdf [file c5ja00309a1.pdf]

## ESI

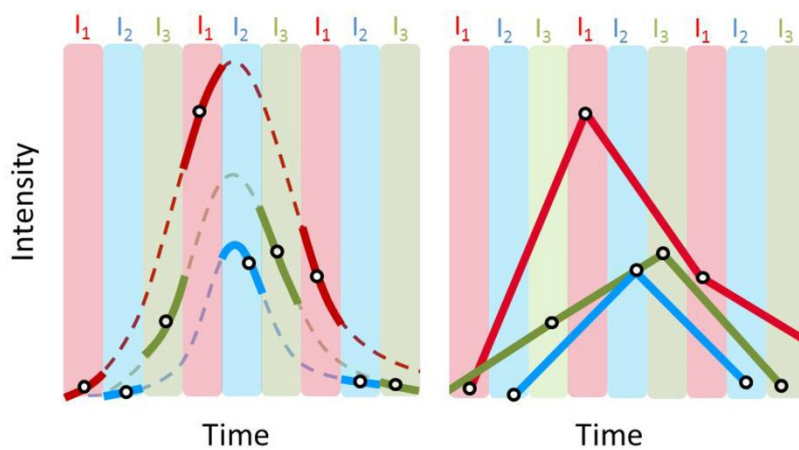

Figure 1 Schematic example of a signal biased by skew effect. (a) Dotted lines represent the actual arrival on the detector of the 3 isotopes. Each color represent the time when the detector records arrival of the isotope  $I_n$ . Resulting points (average of cps during the time of measure per isotope) are represented as black circle.(b) Solid line represent the resulting area integrated for each isotope  $I_n$ .
